# Supplementary material for: Moderate topsoil erosion rates constrain the magnitude of theerosion-induced carbon sink and agricultural productivity losses on theChinese Loess Plateau
Source: Copernicus journal article supplement (doi:10.5194/bg-13-4735-2016), 2016-08-23
Supplement: Supplementary file 1 [file Supplement 1.xlsx]

## Sheet: erosion plots
Supplement 1: Erosion plot database in CLP. AP: annual precipitation (mm); LU: land use type; SL: slope length (m); SD: slope degree (°); PY: plot years; PN: plot number; E: soil loss rate (t ha-1 yr-1).
Lu	Plants/crops	Latitude	Longitude	AP	SL	SD	PY	PN	E	Reference
farmland	spring wheat	35.5506	104.637	420	10	20	14	3	3.99	(Huang et al., 2006)
forest	Pinus tabulaeformis	35.5506	104.637	420	10	20	14	3	0.93	(Huang et al., 2006)
grassland	stipa capillata	35.5506	104.637	420	10	20	14	3	0.3	(Huang et al., 2006)
grassland	alfalfa	35.5506	104.637	420	10	20	14	3	1.68	(Huang et al., 2006)
shrub	Sea buckthorn	35.5506	104.637	420	10	20	14	3	0.2	(Huang et al., 2006)
farmland	cropland	37.75	113.2	518.3	20	3	2	1	1.2	(Wang et al., 2008)
farmland	cropland	37.75	113.2	518.3	20	3	2	1	3.75	(Wang et al., 2008)
farmland	cropland	37.75	113.2	518.3	20	3	2	1	5.2	(Wang et al., 2008)
fallow	fallow	36.8583	109.323	541	20	5	5	1	15.32	(Liu et al., 1994)
fallow	fallow	36.8583	109.323	541	20	10	5	1	44.21	(Liu et al., 1994)
fallow	fallow	36.8583	109.323	541	20	15	5	1	77.52	(Liu et al., 1994)
fallow	fallow	36.8583	109.323	541	20	20	5	1	103.26	(Liu et al., 1994)
fallow	fallow	36.8583	109.323	541	20	25	5	1	139.87	(Liu et al., 1994)
fallow	fallow	36.8583	109.323	541	20	28	5	1	140.7	(Liu et al., 1994)
fallow	fallow	36.8583	109.323	541	10	30	5	1	92.66	(Liu et al., 1994)
fallow	fallow	36.8583	109.323	541	20	30	5	1	128.56	(Liu et al., 1994)
fallow	fallow	36.8583	109.323	541	30	30	5	1	142.2	(Liu et al., 1994)
fallow	fallow	36.8583	109.323	541	40	30	5	1	162.85	(Liu et al., 1994)
farmland	wheat	34.4259	105.623	600	20	4.7	9	1	13.51	(Liu et al., 1994)
farmland	wheat	34.4259	105.623	600	20	5.1	9	1	7.8	(Liu et al., 1994)
farmland	wheat	34.4259	105.623	600	20	5.4	9	1	8.01	(Liu et al., 1994)
farmland	sorghum	37.5102	110.399	485	20	8.6	4	1	5.8	(Liu et al., 1994)
farmland	wheat	34.4259	105.623	600	20	13.9	9	1	23.95	(Liu et al., 1994)
farmland	wheat	34.4259	105.623	600	20	14.1	9	1	25.28	(Liu et al., 1994)
farmland	wheat	34.4259	105.623	600	20	14.2	9	1	24.45	(Liu et al., 1994)
farmland	sorghum	37.5102	110.399	485	20	14.7	4	1	21.93	(Liu et al., 1994)
farmland	wheat	34.4259	105.623	600	20	17.4	9	1	30.87	(Liu et al., 1994)
farmland	wheat	34.4259	105.623	600	20	17.5	9	1	30.23	(Liu et al., 1994)
farmland	wheat	34.4259	105.623	600	20	17.7	9	1	36.25	(Liu et al., 1994)
farmland	sorghum	37.5102	110.399	485	10	21.8	4	1	15.59	(Liu et al., 1994)
farmland	sorghum	37.5102	110.399	485	60	22	4	1	36.59	(Liu et al., 1994)
farmland	sorghum	37.5102	110.399	485	40	23.17	4	1	28	(Liu et al., 1994)
farmland	wheat	34.4259	105.623	600	20	23.7	9	1	65.19	(Liu et al., 1994)
farmland	sorghum	37.5102	110.399	485	20	28.7	4	1	42.71	(Liu et al., 1994)
farmland	sorghum	37.5607	109.869	485-541	20	30	5	1	91.84	(Liu et al., 1994)
farmland	sorghum	37.5607	109.869	485-541	40	30	5	1	153.14	(Liu et al., 1994)
farmland	sorghum	37.5607	109.869	485-541	60	30	5	1	143.11	(Liu et al., 1994)
bare	bare	36.8583	109.323	.	20	24	2	2	0.86	(Fu et al., 2004)
forest	Hippophae rhammoides	36.8583	109.323	.	20	24	2	2	0.1	(Fu et al., 2004)
forest	Cunninghamia lanceolata	36.8583	109.323	.	20	24	2	2	2.39	(Fu et al., 2004)
shrub	Hippophae rhamnoides	36.8583	109.323	.	20	24	2	2	0	(Fu et al., 2004)
shrub	Hippophae rhamnoides	36.8583	109.323	.	20	24	2	2	0.06	(Fu et al., 2004)
farmland	farmland	36.5975	109.3	549	20	27	10	1	30.27	(Hou and Cao, 1990)
forest	Caragana microphylla	36.5975	109.3	549	20	27	10	1	0.05	(Hou and Cao, 1990)
forest	Robinia pseudoacacia	36.5975	109.3	549	20	27	10	1	0.33	(Hou and Cao, 1990)
forest	Robinia pseudoacacia	36.5975	109.3	549	20	27	6	1	6.99	(Hou and Cao, 1990)
grassland	Astragalus dsurgens	36.5975	109.3	549	20	27	6	1	0.76	(Hou and Cao, 1990)
grassland	natural grassland	36.5975	109.3	549	20	27	10	1	11.46	(Hou and Cao, 1990)
grassland	Medicago sativa	36.5975	109.3	549	20	27	6	1	18.92	(Hou and Cao, 1990)
grassland	Armeniaca vulgaris	36.7	109.52	535	5	22	2	1	4.07	(Liu et al., 2012)
grassland	Artemisia scoparia	36.7	109.52	535	5	22	2	1	14.6	(Liu et al., 2012)
grassland	Armeniaca vulgaris	36.7	109.52	535	9	22	2	1	2.79	(Liu et al., 2012)
grassland	Artemisia scoparia	36.7	109.52	535	9	22	2	1	12.91	(Liu et al., 2012)
grassland	Artemisia scoparia	36.7	109.52	535	13	22	2	1	5.09	(Liu et al., 2012)
grassland	Armeniaca vulgaris	36.7	109.52	535	13	22	2	1	7.41	(Liu et al., 2012)
shrub	Robinia pseudoacacia	36.7	109.52	535	5	22	2	1	10.37	(Liu et al., 2012)
shrub	Robinia pseudoacacia	36.7	109.52	535	9	22	2	1	6.56	(Liu et al., 2012)
shrub	Robinia pseudoacacia	36.7	109.52	535	13	22	2	1	1.75	(Liu et al., 2012)
bare	bare	36.0833	109.183	576.7	86.3	32	2	1	103.24	(Tang et al., 1993)
bare	bare	36.0833	109.183	576.7	136.3	35	2	1	152.86	(Tang et al., 1993)
bare	bare	36.0833	109.183	576.7	152.5	36	3	1	0	(Tang et al., 1993)
bare	bare	36.0833	109.183	576.7	48.8	39.5	2	1	217.74	(Tang et al., 1993)
farmland	farmland	36.0833	109.183	576.7	99.2	34	2	1	97.03	(Tang et al., 1993)
farmland	farmland	36.0833	109.183	576.7	41	39.5	2	1	131.79	(Tang et al., 1993)
forest	forest	36.0833	109.183	576.7	80.2	32	3	1	0.01	(Tang et al., 1993)
forest	forest	36.0833	109.183	576.7	141.4	35	3	1	0.01	(Tang et al., 1993)
forest	forest	36.0833	109.183	576.7	38.2	39.5	3	1	0.14	(Tang et al., 1993)
fallow	fallow	38.7954	110.367	437.4	20	11	1	1	2.72	(Jiang and Shao, 2011)
farmland	ceral	38.7954	110.367	437.4	20	15	1	1	19.66	(Jiang and Shao, 2011)
farmland	bean	38.7954	110.367	437.4	20	17	1	1	22.86	(Jiang and Shao, 2011)
grassland	alfalfa	38.7954	110.367	437.4	20	12	1	1	2.33	(Jiang and Shao, 2011)
shrub	Caragana microphylla	38.7954	110.367	437.4	20	12	1	1	1.04	(Jiang and Shao, 2011)
farmland	millet	36.1167	110.783	579.5	20	20	2	1	0.014	(Zhang et al., 2005)
forest	Ostryopsis davidiana	36.1167	110.783	579.5	20	23	2	1	0.003	(Zhang et al., 2005)
forest	Populus davidiana	36.1167	110.783	579.5	20	23	2	1	0.003	(Zhang et al., 2005)
forest	Robinia pseudoacacia	36.1167	110.783	579.5	20	23	2	1	0.017	(Zhang et al., 2005)
forest	Pinus tablaeformis	36.1167	110.783	579.5	20	25	2	1	0.003	(Zhang et al., 2005)
forest	Robinia pseudoacacia	36.1167	110.783	579.5	20	25	2	1	0.006	(Zhang et al., 2005)
orchard	apply	36.1167	110.783	579.5	20	25	2	1	0.006	(Zhang et al., 2005)
farmland	wheat	35.5506	104.637	427	10	10	14	1	1.48	(Chen et al., 2010)
farmland	wheat	35.5506	104.637	427	10	15	14	1	3.01	(Chen et al., 2010)
farmland	wheat	35.5506	104.637	427	10	20	14	1	7.84	(Chen et al., 2010)
forest	Pinus tabuliformis	35.5506	104.637	427	10	10	14	1	0.86	(Chen et al., 2010)
forest	Pinus tabuliformis	35.5506	104.637	427	10	15	14	1	0.96	(Chen et al., 2010)
forest	Pinus tabuliformis	35.5506	104.637	427	10	20	14	1	2.36	(Chen et al., 2010)
grassland	Stipa bungeana	35.5506	104.637	427	10	10	14	1	0.45	(Chen et al., 2010)
grassland	alfalfa	35.5506	104.637	427	10	10	14	1	0.96	(Chen et al., 2010)
grassland	Stipa bungeana	35.5506	104.637	427	10	15	14	1	0.44	(Chen et al., 2010)
grassland	alfalfa	35.5506	104.637	427	10	15	14	1	1.48	(Chen et al., 2010)
grassland	Stipa bungeana	35.5506	104.637	427	10	20	14	1	0.51	(Chen et al., 2010)
grassland	alfalfa	35.5506	104.637	427	10	20	14	1	3.11	(Chen et al., 2010)
shrub	sea buckthorn	35.5506	104.637	427	10	10	14	1	0.41	(Chen et al., 2010)
shrub	sea buckthorn	35.5506	104.637	427	10	15	14	1	0.41	(Chen et al., 2010)
shrub	sea buckthorn	35.5506	104.637	427	10	20	14	1	0.47	(Chen et al., 2010)
bare	bare	40.2774	113.614	425	20	12	3	1	4.55	(Ma and Wang, 2009)
grassland	wild grass	40.2774	113.614	425	20	12	3	1	1.48	(Ma and Wang, 2009)
grassland	natural grassland	35.2333	107.683	582.3	20	35	1	1	31.36	(Chen et al., 2008)
farmland	farmland	39.8261	111.24	395.6	20	5.43	4.5	1	64.24	(Wang, 2000)
grassland	natural grassland	39.8261	111.24	395.6	20	5.43	4.5	1	59.56	(Wang, 2000)
farmland	maize	35.7	107.617	.	.	24	11	1	17.77	(Li et al., 2006)
grassland	Arundinella hirta	35.7	107.617	.	.	27.5	12	1	40.2	(Li et al., 2006)
fallow	fallow	36.8583	109.323	580.4	20	24	1	2	0.04	(Zhao et al., 2006)
farmland	farmland	36.8583	109.323	580.4	20	24	1	2	1.69	(Zhao et al., 2006)
forest	Hippophae rhamnoides	36.8583	109.323	580.4	20	24	1	2	0	(Zhao et al., 2006)
forest	Robinia pseudoacacia	36.8583	109.323	580.4	20	24	1	2	0	(Zhao et al., 2006)
forest	Hippophae rhamnoides	36.8583	109.323	580.4	20	24	1	2	0.01	(Zhao et al., 2006)
forest	Platycladus orientalis	36.8583	109.323	580.4	20	24	1	2	0.02	(Zhao et al., 2006)
forest	Hippophae rhamnoides	36.8583	109.323	580.4	20	24	1	2	0.03	(Zhao et al., 2006)
forest	Pinus tabulaeformis	36.8583	109.323	580.4	20	24	1	2	0.08	(Zhao et al., 2006)
grassland	natural grassland	36.8583	109.323	580.4	20	24	1	2	0.01	(Zhao et al., 2006)
grassland	artificial grassland	36.8583	109.323	580.4	20	24	1	2	0.08	(Zhao et al., 2006)
shrub	Caragana microphylla	36.8583	109.323	580.4	20	24	1	2	0	(Zhao et al., 2006)
farmland	wheat	35.5506	104.637	420	10	10	14	1	0.19	(Zhang and Wang, 2008)
farmland	wheat	35.5506	104.637	420	10	15	14	1	0.39	(Zhang and Wang, 2008)
farmland	wheat	35.5506	104.637	420	10	20	14	1	0.83	(Zhang and Wang, 2008)
forest	Pinus tabulaeformis	35.5506	104.637	420	10	10	14	1	0.05	(Zhang and Wang, 2008)
forest	Pinus tabulaeformis	35.5506	104.637	420	10	15	14	1	0.08	(Zhang and Wang, 2008)
forest	Pinus tabulaeformis	35.5506	104.637	420	10	20	14	1	0.1	(Zhang and Wang, 2008)
grassland	stipa capillata	35.5506	104.637	420	10	10	14	1	0.02	(Zhang and Wang, 2008)
grassland	alfalfa	35.5506	104.637	420	10	10	14	1	0.15	(Zhang and Wang, 2008)
grassland	stipa capillata	35.5506	104.637	420	10	15	14	1	0.03	(Zhang and Wang, 2008)
grassland	alfalfa	35.5506	104.637	420	10	15	14	1	0.21	(Zhang and Wang, 2008)
grassland	stipa capillata	35.5506	104.637	420	10	20	14	1	0.03	(Zhang and Wang, 2008)
grassland	alfalfa	35.5506	104.637	420	10	20	14	1	0.5	(Zhang and Wang, 2008)
shrub	Hippophae rhamnoides	35.5506	104.637	420	10	10	14	1	0.01	(Zhang and Wang, 2008)
shrub	Hippophae rhamnoides	35.5506	104.637	420	10	15	14	1	0.01	(Zhang and Wang, 2008)
shrub	Hippophae rhamnoides	35.5506	104.637	420	10	20	14	1	0.02	(Zhang and Wang, 2008)
grassland	Humulus scandens	34.8327	108.512	.	20	23	2	3	1.02	(Yang et al., 2003)
grassland	alfalfa	34.8327	108.512	.	20	23	2	3	2.3	(Yang et al., 2003)
grassland	Humulus scandens	37.774	110.278	.	20	23	2	3	4.3	(Yang et al., 2003)
grassland	natural grassland	34.8327	108.512	.	20	23	2	3	4.66	(Yang et al., 2003)
grassland	alfalfa	37.774	110.278	.	20	23	2	3	6.58	(Yang et al., 2003)
grassland	natural grassland	37.774	110.278	.	20	23	2	3	15.57	(Yang et al., 2003)
grassland	Humulus scandens	34.8327	108.512	.	20	25	2	3	1.17	(Yang et al., 2003)
grassland	alfalfa	34.8327	108.512	.	20	25	2	3	2.81	(Yang et al., 2003)
grassland	Humulus scandens	37.774	110.278	.	20	25	2	3	5.03	(Yang et al., 2003)
grassland	natural grassland	34.8327	108.512	.	20	25	2	3	5.37	(Yang et al., 2003)
grassland	alfalfa	37.774	110.278	.	20	25	2	3	9.54	(Yang et al., 2003)
grassland	natural grassland	37.774	110.278	.	20	25	2	3	20.1	(Yang et al., 2003)
grassland	alfalfa	35.5506	104.637	427	20	13	1	1	0.11	(Liu, 2009)
grassland	Astragalus adsurgens	35.5506	104.637	427	20	13	1	1	0.15	(Liu, 2009)
grassland	alfalfa	35.5506	104.637	427	20	13	1	1	0.16	(Liu, 2009)
grassland	Astragalus adsurgens	35.5506	104.637	427	20	13	1	1	0.19	(Liu, 2009)
grassland	alfalfa	35.5506	104.637	427	20	13	1	1	0.29	(Liu, 2009)
grassland	Astragalus adsurgens	35.5506	104.637	427	20	13	1	1	0.33	(Liu, 2009)
fallow	fallow	35.001	108.877	.	20	3	1	1	0.31	(Wu et al., 1998)
fallow	fallow	35.001	108.877	.	20	3	1	1	0.57	(Wu et al., 1998)
fallow	fallow	35.0775	108.082	.	40	3	1	1	1.66	(Wu et al., 1998)
farmland	bean	35.7824	107.514	.	20	0.86	1	1	0.5	(Wu et al., 1998)
farmland	bean	35.7824	107.514	.	20	0.86	1	1	1.57	(Wu et al., 1998)
farmland	maize	35.7824	107.514	.	20	2.17	1	1	0.25	(Wu et al., 1998)
farmland	sorghum	35.7824	107.514	.	20	2.17	1	1	0.86	(Wu et al., 1998)
farmland	millet	35.7824	107.514	.	25	12.35	1	1	1.56	(Wu et al., 1998)
farmland	millet	35.7824	107.514	.	25	12.35	1	1	52.88	(Wu et al., 1998)
farmland	maize	35.0775	108.082	.	25	20	1	1	1.11	(Wu et al., 1998)
farmland	maize	35.0775	108.082	.	25	20	1	1	104.3	(Wu et al., 1998)
farmland	maize	35.0775	108.082	.	25	20	1	1	192.5	(Wu et al., 1998)
farmland	maize	35.0775	108.082	.	27	20	1	1	55.6	(Wu et al., 1998)
farmland	maize	35.0775	108.082	.	27	20	1	1	132.3	(Wu et al., 1998)
farmland	maize	35.0775	108.082	.	30	20	1	1	0.7	(Wu et al., 1998)
farmland	maize	35.0775	108.082	.	30	20	1	1	3.92	(Wu et al., 1998)
farmland	maize	35.0775	108.082	.	30	20	1	1	4.92	(Wu et al., 1998)
farmland	maize	35.0775	108.082	.	30	20	1	1	7.39	(Wu et al., 1998)
farmland	maize	35.0775	108.082	.	30	20	1	1	8.21	(Wu et al., 1998)
farmland	sorghum	35.0775	108.082	.	15.6	26.2	1	1	0.8	(Wu et al., 1998)
farmland	sorghum	35.0775	108.082	.	15.6	26.2	1	1	1.02	(Wu et al., 1998)
farmland	sorghum	35.0775	108.082	.	15.6	26.2	1	1	17.92	(Wu et al., 1998)
farmland	sorghum	35.0775	108.082	.	22.3	26.2	1	1	2	(Wu et al., 1998)
farmland	sorghum	35.0775	108.082	.	22.3	26.2	1	1	35.39	(Wu et al., 1998)
farmland	sorghum	35.2333	107.683	.	22.7	28.4	1	1	6.2	(Wu et al., 1998)
farmland	millet	35.2333	107.683	.	22.7	28.4	1	1	30.65	(Wu et al., 1998)
farmland	millet	35.2333	107.683	.	22.7	28.4	1	1	244.82	(Wu et al., 1998)
grassland	artificial grassland	35.0775	108.082	.	40	3	1	1	0.77	(Wu et al., 1998)
grassland	Melilotus suaveolens	35.0775	108.082	.	40	3	1	1	0.89	(Wu et al., 1998)
farmland	winter wheat	35.7824	107.514	.	50	2	1	1	3.56	(Yan et al., 2013)
farmland	winter wheat	35.7824	107.514	.	35	2.63	1	1	0.19	(Yan et al., 2013)
farmland	winter wheat	35.7824	107.514	.	34	2.85	1	1	0.29	(Yan et al., 2013)
farmland	winter wheat	35.7824	107.514	.	35	2.85	1	1	0.41	(Yan et al., 2013)
farmland	winter wheat	34.8458	105.382	.	20	4.72	3	1	3.85	(Yan et al., 2013)
farmland	maize	34.8458	105.382	.	20	4.72	1	1	4.04	(Yan et al., 2013)
farmland	hyacinth bean	34.8458	105.382	.	20	4.72	2	1	8.29	(Yan et al., 2013)
farmland	maize	37.4973	110.28	.	20	4.83	1	1	0.31	(Yan et al., 2013)
farmland	winter wheat	37.4973	110.28	.	20	4.83	1	1	7.64	(Yan et al., 2013)
farmland	hyacinth bean	34.8458	105.382	.	20	5.07	4	1	4.85	(Yan et al., 2013)
farmland	maize	34.8458	105.382	.	20	5.07	2	1	6.08	(Yan et al., 2013)
farmland	winter wheat	34.8458	105.382	.	20	5.07	3	1	13.31	(Yan et al., 2013)
farmland	hyacinth bean	37.4973	110.28	.	20	5.3	1	1	0.91	(Yan et al., 2013)
farmland	maize	37.4973	110.28	.	20	5.3	2	1	1.06	(Yan et al., 2013)
farmland	winter wheat	37.4973	110.28	.	20	5.3	1	1	6.41	(Yan et al., 2013)
farmland	hyacinth bean	34.8458	105.382	.	20	5.35	2	1	1.65	(Yan et al., 2013)
farmland	maize	34.8458	105.382	.	20	5.35	2	1	2.29	(Yan et al., 2013)
farmland	winter wheat	34.8458	105.382	.	20	5.35	2	1	8.82	(Yan et al., 2013)
farmland	hyacinth bean	37.4973	110.28	.	20	8.57	1	1	6.41	(Yan et al., 2013)
farmland	winter wheat	37.4973	110.28	.	20	9.73	1	1	8.03	(Yan et al., 2013)
farmland	winter wheat	35.7824	107.514	.	15	11.43	1	1	11.16	(Yan et al., 2013)
farmland	winter wheat	35.7824	107.514	.	16	11.45	1	1	7.3	(Yan et al., 2013)
farmland	winter wheat	35.7824	107.514	.	15	11.72	1	1	4.01	(Yan et al., 2013)
farmland	winter wheat	35.7824	107.514	.	15	11.92	1	1	12.06	(Yan et al., 2013)
farmland	winter wheat	34.8458	105.382	.	20	12.98	1	1	1.89	(Yan et al., 2013)
farmland	hyacinth bean	34.8458	105.382	.	20	13.93	2	1	14.86	(Yan et al., 2013)
farmland	winter wheat	34.8458	105.382	.	20	13.93	3	1	16.38	(Yan et al., 2013)
farmland	maize	34.8458	105.382	.	20	13.93	2	1	24.86	(Yan et al., 2013)
farmland	hyacinth bean	34.8458	105.382	.	20	14.13	2	1	1.91	(Yan et al., 2013)
farmland	maize	34.8458	105.382	.	20	14.13	4	1	19.52	(Yan et al., 2013)
farmland	winter wheat	34.8458	105.382	.	20	14.13	3	1	39.36	(Yan et al., 2013)
farmland	maize	34.8458	105.382	.	20	14.22	2	1	6.98	(Yan et al., 2013)
farmland	winter wheat	34.8458	105.382	.	20	14.22	3	1	32.62	(Yan et al., 2013)
farmland	hyacinth bean	34.8458	105.382	.	20	14.22	2	1	42.76	(Yan et al., 2013)
farmland	maize	37.4973	110.28	.	20	14.25	1	1	0.34	(Yan et al., 2013)
farmland	maize	37.4973	110.28	.	20	14.65	1	1	75.65	(Yan et al., 2013)
farmland	hyacinth bean	37.4973	110.28	.	20	14.68	1	1	19.03	(Yan et al., 2013)
farmland	winter wheat	37.4973	110.28	.	20	17.35	1	1	10.45	(Yan et al., 2013)
farmland	maize	37.4973	110.28	.	20	17.35	1	1	20.7	(Yan et al., 2013)
farmland	hyacinth bean	34.8458	105.382	.	20	17.38	1	1	7.51	(Yan et al., 2013)
farmland	winter wheat	34.8458	105.382	.	20	17.38	2	1	20.71	(Yan et al., 2013)
farmland	maize	34.8458	105.382	.	20	17.38	3	1	22.53	(Yan et al., 2013)
farmland	hyacinth bean	34.8458	105.382	.	20	17.45	3	1	20.44	(Yan et al., 2013)
farmland	winter wheat	34.8458	105.382	.	20	17.45	2	1	30.99	(Yan et al., 2013)
farmland	maize	34.8458	105.382	.	20	17.45	3	1	32.94	(Yan et al., 2013)
farmland	winter wheat	34.8458	105.382	.	20	17.67	1	1	0.65	(Yan et al., 2013)
farmland	maize	34.8458	105.382	.	20	17.67	2	1	17.12	(Yan et al., 2013)
farmland	hyacinth bean	34.8458	105.382	.	20	17.67	3	1	24.35	(Yan et al., 2013)
farmland	winter wheat	35.7824	107.514	.	16	19.25	1	1	11.93	(Yan et al., 2013)
farmland	winter wheat	35.7824	107.514	.	16	19.45	1	1	1.16	(Yan et al., 2013)
grassland	alfalfa	34.8458	105.382	.	20	12.97	1	1	9.87	(Yan et al., 2013)
grassland	Melilotus suaveolens	37.4973	110.28	.	20	14.03	1	1	1.69	(Yan et al., 2013)
bare	bare	35.325	110.092	600	20	5	3	1	3.21	(J. Wang et al., 2011)
bare	bare	35.325	110.092	600	20	10	3	1	15.81	(J. Wang et al., 2011)
bare	bare	35.325	110.092	600	20	15	3	1	38.2	(J. Wang et al., 2011)
farmland	maize	35.325	110.092	600	20	5	3	1	2	(J. Wang et al., 2011)
farmland	maize	35.325	110.092	600	20	10	3	1	12.4	(J. Wang et al., 2011)
farmland	maize	35.325	110.092	600	20	15	3	1	29.57	(J. Wang et al., 2011)
grassland	alfalfa	35.325	110.092	600	20	5	3	1	0.45	(J. Wang et al., 2011)
grassland	alfalfa	35.325	110.092	600	20	10	3	1	3.56	(J. Wang et al., 2011)
grassland	alfalfa	35.325	110.092	600	20	15	3	1	4.24	(J. Wang et al., 2011)
bare	bare	36.4333	109.458	.	16	21.5	1	1	0.28	(Deng et al., 2011)
bare	bare	36.4333	109.458	.	16	21.5	1	1	0.41	(Deng et al., 2011)
bare	bare	36.4333	109.458	.	16	21.5	1	1	61.82	(Deng et al., 2011)
forest	Robinia pseudoacacia	36.4333	109.458	.	16	21.5	1	1	0.22	(Deng et al., 2011)
grassland	Setaria viridis	36.4333	109.458	.	16	21.5	1	1	7.78	(Deng et al., 2011)
shrub	Bletilla striata	36.4333	109.458	.	16	21.5	1	1	0.74	(Deng et al., 2011)
farmland	wheat	35.9869	110.113	584.4	20	25	14	1	13.92	(L. Wang et al., 2011)
forest	Pinus tabulaeformis	35.9869	110.113	584.4	20	22	14	2	0.24	(L. Wang et al., 2011)
forest	Pinus tabulaeformis	35.9869	110.113	584.4	20	25	14	2	0.02	(L. Wang et al., 2011)
grassland	Rubus	35.9869	110.113	584.4	20	23	14	2	0.14	(L. Wang et al., 2011)
forest	Pinus tabulaeformis	36.908	108.181	.	20	12	2	1	0.28	(Zhou et al., 2011)
forest	Hippophae rhamnoides	36.908	108.181	.	20	17	2	1	0.33	(Zhou et al., 2011)
forest	Pinus tabulaeformis	36.908	108.181	.	20	17	2	1	0.97	(Zhou et al., 2011)
forest	Pinus tabulaeformis	36.908	108.181	.	20	29	2	1	0.48	(Zhou et al., 2011)
grassland	Lespedeza bicolor	36.908	108.181	.	20	28	2	1	0.49	(Zhou et al., 2011)
bare	bare	36.8482	109.598	536.9	16	21.5	2	1	33.97	(Liu et al., 2011)
grassland	leymus secalinus	36.8482	109.598	536.9	16	21.5	2	1	2.37	(Liu et al., 2011)
shrub	Bletilla striata	36.8482	109.598	536.9	16	21.5	2	1	0.85	(Liu et al., 2011)

## Sheet: reference
Reference
Chen, J., Liu, W., Zhang, X., Zhang, B., Wang, B., Yang, Y., 2008. Soil and water conservation benefits and suitability of different forestation trees in tableland-gully area of the Loess Plateau. J. Northwest A F Univ. (Nat. Sci. Ed.) 36, 97–112.
Chen, P., Chen, L., Wang, Y., Zhang, F., Wu, D., 2010. Effect of Land Use Pattern on Runoff and Sediment Yield on Slope lands in Loess Hilly Region. J. Ecol. Rural Environ. 26, 199–204.
Deng, R., Wang, B., Liu, P., Liu, D., Xu, J., 2011. Effects of Different Land Use Patterns On Soil Organic Carbon Loss on the Loess Slope. Res. soil water Conserv. 18, 104–107.
Fu, B.J., Meng, Q.H., Qiu, Y., Zhao, W.W., Zhang, Q.J., Davidson, D. a., 2004. Effects of land use on soil erosion and nitrogen loss in the hilly area of the Loess Plateau, China. L. Degrad. Dev. 15, 87–96.
Hou, X., Cao, Q., 1990. Study on the benefits of plants to reduce sediment in the loess rolling gullied region of north Shaanxi. Bullet Soil Water Conserv. 10, 33–40.
Huang, Z.L., Chen, L.D., Fu, B.J., Lu, Y.H., Huang, Y.L., Gong, J., 2006. The relative efficiency of four representative cropland conversions in reducing water erosion: evidence from long-term plots in the Loess hilly area, China. L. Degrad. Dev. 17, 615–627.
Jiang, N., Shao, M., 2011. Characteristics of soil and water loss of different slope land uses in small watershed on the Loess Plateau. Trans. CSAE 27, 36–41.
Li, M., Song, X., Shen, B., Li, H., Meng, C., 2006. Influence of vegetation change on producing runoff and sediment in gully region of Loess Plateau. J. Northwest A F Univ. (Nat. Sci. Ed.) 24, 117–120.
Liu, B., Nearing, M.A., Risse, L.M., 1994. Slope gradient effects on soil loss steep slopes. Trans. ASAE 37, 1835–1840.
Liu, D., Liu, P., Deng, R., Xu, J., Chen, L., 2011. Erosion Characteristic of Plots with Various Underlying Surfaces in Single Rainfall. Bullet Soil Water Conserv. 31, 99–102.
Liu, X., 2009. Effects of perennial leguminous plants to soil erosion and nutrient loss of reforestation land in gullied-hilly area of Chinese loess plateau. Gansu Sinence Technol. 25, 58–61.
Liu, Y., Fu, B., Lü, Y., Wang, Z., Gao, G., 2012. Hydrological responses and soil erosion potential of abandoned cropland in the Loess Plateau, China. Geomorphology 138, 404–414.
Ma, J., Wang, Z., 2009. Soil and water conservation benefits of artificial grassland in Yanggao County. Soil Water Conserv. Sci. Technol. Shanxi 14–17.
Tang, K., Xiong, G., Liang, J., Jing, K., Zhang, S., Chen, Y., Li, S., 1993. Varieties of erosion and runoff sediment in Yellow River Basin. Chinese Sciences and Technique Press, Beijing.
Wang, J., Luo, S., Ye, D., 2008. Benefits of biological measures to the soil and water conservation in Gannan Mountain Area. Sci. Soil Water Conserv. 6, 37–43.
Wang, J., Yin, W., Liu, D., 2011. Influence of Intercropping Maize with Alfalfa on Runoff and Sediment Yield after Rainfall on Loess Slope Land. Water Sav. Irrig. 43–46, 54.
Wang, L., Zhu, S., Chen, Y., Huang, L., 2011. Soil and Water Conservation Function of Pinus tabulaeformis Plantation in the Forest Zone of Loess Plateau. J. Northwest For. Coll. 26, 47–52.
Wang, X., 2000. Study of Sediment Source of Small Watershed in Pisha Rock Area. Soil Water Conserv. China 4, 17–18.
Wu, F., Zhao, X., Liu, B., Jia, R., 1998. Influence of Cultivation Activities on the Runoff and Erosion on Slopeland. J. Northwest For. Coll. 13, 20–25.
Yan, L., Hou, Q., Wang, F., Mu, X., 2013. Effectiveness of Soil and Water Conservation Practices in Runoff Control on Slope Lands in Loess Plateau. Bullet Soil Water Conserv. 33, 213–217.
Yang, K., Jinglin, L., Zhang, G., 2003. Efficiency of Humulus Scandens on Soil and Water Conservation. Bullet Soil Water Conserv. 23, 26–28.
Zhang, J., Wang, X., 2008. Soil and Water Loss in Different Land-Use ofGullied Rolling Loess Area of Dingxi. Soil Water Conserv. China 317, 31–32, 38.
Zhang, X., Yu, X., Wu, S., Wei, T., Zhang, X., 2005. Effects of forest vegetation on Runoff and Sediment Production on Sloping Lands of Loess area. Chinese J. Appl. Ecol. 16, 1613–1617.
Zhao, H., Liu, G., Cao, Q., Wu, R., 2006. Influence of Different Land Use Types on Soil Erosion and Nutrition Care Effect in Loess Hilly Region. J. Soil Water Conserv. 20, 20–24, 54.
Zhou, Y., Wei, T., Xie, J., Shi, X., Ge, G., Dong, Z., Cheng, Z., 2011. Different Types of Vegetation Cover and Water Conservation Benefits. J. Soil Water Conserv. 25, 12–21.
