# Supplementary material for: Moderate topsoil erosion rates constrain the magnitude of theerosion-induced carbon sink and agricultural productivity losses on theChinese Loess Plateau
Source: Copernicus journal article supplement (doi:10.5194/bg-13-4735-2016), 2016-08-23
Supplement: Supplementary file 2 [file Supplement 2.xlsx]

## Sheet: GEps
Supplement 2: Google earth sample(GEps)：landuse (GE) is the landuse type recognized by google earth; landuse(2005) is the landuse type in land use dataset(2005); terrace: Y means terraced farmland while N means sloping farmland.
ID	Longtitude	Latitude	Slope gradient(degree)	Landuse(GE)	Landuse(2005)	Landform	Terrace	Slope length(meter)
1	109.186	40.2044	2.12	desert	desert	desert
2	111.181	38.6868	16.5	grassland	grassland	gully
3	106.727	36.3631	21.35	farmland	farmland	hilly	Y	61
4	112.967	38.192	20.44	forest	forest	forest
5	106.665	35.1163	9.56	farmland	farmland	hilly	Y	28.17
6	106.961	39.2572	4.97	grassland	grassland	gully
7	106.807	37.5773	6	grassland	grassland	desert
8	112.466	37.6603	0.58	built-up	farmland	other
9	108.368	34.6817	5.3	farmland	farmland	flat	N	201
10	109.433	36.1704	6.03	forest	grassland	forest
11	111.856	38.775	20.48	forest	forest	forest
12	111.349	34.944	28.03	forest	forest	forest
13	109.519	38.5473	2.57	desert	desert	desert
14	106.736	35.5142	3	built-up	built-up	other
15	113.856	39.875	14.45	forest	forest	forest
16	111.358	37.6079	20.06	forest	forest	forest
17	105.874	37.7933	1.63	built-up	grassland	other
18	110.812	39.2973	10.2	farmland	grassland	hilly	N	48
19	112.156	39.3662	9.61	farmland	grassland	hilly	Y	56.47
20	111.203	38.1839	8.98	grassland	farmland	hilly
21	109.513	39.5351	1.8	farmland	farmland	flat	N	79
22	107.22	36.59	6.61	grassland	grassland	gully
23	112.14	34.4637	7.58	farmland	farmland	hilly	N	14.24
24	111.322	37.7049	6.55	forest	forest	forest
25	106.879	36.2806	7.22	farmland	grassland	hilly	N	45
26	112.67	39.3889	1.63	farmland	farmland	flat	N	237
27	106.04	37.4442	0.77	farmland	desert	flat	N	28
28	112.506	35.6437	5.88	grassland	grassland	gully
29	110.359	40.0857	0.51	water	water	desert
30	111.234	39.7971	6.46	farmland	farmland	hilly	N	45
31	108.069	37.9702	1.29	water	water	desert
32	106.535	36.3426	25.16	grassland	grassland	hilly
33	110.584	37.3979	16.73	desert	desert	gully
34	110.894	36.3554	16.47	farmland	grassland	gully	N	56
35	107.578	39.9298	4.31	grassland	grassland	desert
36	107.067	37.7625	6.21	farmland	farmland	desert	N	70
37	113.301	34.7457	10.8	farmland	farmland	hilly	N	36
38	108.772	38.6275	0.26	grassland	grassland	desert
39	107.782	37.0128	6.73	farmland	grassland	gully	N	29
40	107.79	38.0421	2.33	grassland	grassland	desert
41	104.024	35.5632	16.33	built-up	farmland	other
42	107.671	38.3431	1.03	grassland	grassland	desert
43	106.388	37.1848	3.99	grassland	grassland	desert
44	108.595	36.5267	18.66	grassland	grassland	hilly
45	110.088	36.9328	25.88	farmland	farmland	hilly	N	36
46	113.108	39.7565	0.26	farmland	farmland	flat	N	250
47	110.199	36.3482	22.58	grassland	farmland	gully
48	107.909	40.4664	6.13	grassland	grassland	desert
49	110.681	35.7432	11.79	built-up	grassland	other
50	105.907	34.5053	4.26	farmland	farmland	flat	N	10
51	106.558	37.5818	4.64	grassland	grassland	desert
52	112.477	35.16	5.54	farmland	farmland	flat	N	71
53	106.141	35.8657	10.65	farmland	grassland	hilly	Y	30
54	102.588	36.2096	37.9	forest	forest	forest
55	108.735	35.9616	16.45	forest	forest	forest
56	107.783	37.2067	6.3	grassland	grassland	gully
57	105.883	35.9799	16.44	farmland	grassland	hilly	Y	8
58	106.777	40.4595	1.65	farmland	grassland	flat	N	175
59	107.442	37.2191	17.44	grassland	farmland	gully
60	113.547	36.7752	38.07	grassland	grassland	hilly
61	113.159	36.4284	10.69	farmland	forest	hilly	Y	26
62	113.868	38.0004	20.06	grassland	grassland	hilly
63	107.278	34.2486	12.22	forest	forest	forest
64	108.733	37.5509	6.32	grassland	grassland	hilly
65	109.251	37.8287	8.47	grassland	farmland	gully
66	113.469	37.6866	17.65	forest	forest	forest
67	111.873	40.328	20.54	grassland	farmland	hilly
68	106.75	34.5521	28.2	grassland	grassland	hilly
69	110.328	34.751	17.7	forest	grassland	forest
70	108.281	40.7064	2.18	desert	desert	desert
71	111.769	38.8722	3.61	grassland	grassland	flat
72	107.073	39.34	4.03	grassland	grassland	hilly
73	106.363	35.5135	13.81	farmland	farmland	hilly	Y	8.7
74	113.664	37.8757	9.04	built-up	forest	other
75	113.096	37.2953	8.37	grassland	forest	gully
76	106.572	35.6256	14.02	farmland	farmland	hilly	Y	3
77	106.18	35.3848	10.82	farmland	grassland	hilly	Y	16
78	109.468	38.3191	0.81	grassland	grassland	desert
79	109.534	35.2095	4.31	farmland	farmland	flat	N	168
80	112.464	34.6396	2.37	built-up	built-up	other
81	109.428	34.9112	1.03	farmland	farmland	flat	N	296
82	113.796	39.5127	25.67	grassland	forest	hilly
83	106.712	38.1635	7.67	grassland	grassland	hilly
84	103.489	35.8475	16.38	grassland	grassland	hilly
85	112.671	35.1091	1.15	farmland	farmland	flat	N	120
86	105.14	35.8204	22.67	grassland	grassland	hilly	Y	4
87	104.615	36.3468	20.37	grassland	grassland	gully
88	101.895	36.6603	9.51	farmland	grassland	hilly	Y	8
89	106.545	35.2813	13.42	farmland	farmland	hilly	Y	8
90	111.987	37.6306	10.99	farmland	farmland	hilly	Y	11
91	108.59	38.7663	2.43	desert	desert	desert
92	107.465	37.2056	20.48	grassland	grassland	hilly
93	110.766	38.641	6.78	grassland	farmland	hilly
94	104.422	35.5809	12.31	farmland	grassland	hilly	Y	8
95	113.524	37.9589	19.05	forest	forest	forest
96	111.523	36.8084	9.26	farmland	farmland	hilly	N	47
97	108.668	40.7382	1.8	built-up	farmland	other
98	104.928	35.2018	11.01	farmland	farmland	hilly	Y	10
99	106.318	35.104	10.38	forest	grassland	forest
100	111.8	36.8639	12.64	built-up	grassland	other
101	107.71	38.8762	2.07	desert	desert	desert
102	111.229	36.6322	9.6	forest	forest	forest
103	104.213	35.2846	16.67	grassland	grassland	gully
104	106.461	37.6716	5.3	desert	desert	desert
105	109.165	39.3644	4.12	desert	desert	desert
106	111.611	35.9374	10.56	farmland	grassland	hilly	N	11
107	106.214	35.5795	33.03	forest	forest	forest
108	108.481	40.0698	4.15	grassland	grassland	desert
109	104.292	35.1625	20.31	farmland	farmland	hilly	Y	8
110	113.286	39.7225	0.26	built-up	farmland	other
111	111.434	37.1412	7.41	grassland	forest	hilly
112	111.39	34.4894	17.15	forest	forest	forest
113	111.344	36.471	15.74	forest	farmland	forest
114	111.657	40.7576	1.03	built-up	farmland	other
115	110.552	38.7668	10.14	farmland	grassland	hilly	N	79
116	107.373	39.4353	2.57	grassland	grassland	desert
117	107.456	39.8047	2.65	grassland	grassland	desert
118	110.604	35.126	8.79	grassland	farmland	gully
119	112.005	40.5495	15.98	farmland	forest	hilly	N	20
120	105.022	37.0605	10.92	grassland	grassland	desert
121	112.283	34.8245	6.02	farmland	farmland	flat	N	30
122	106.702	36.3539	17.64	grassland	grassland	hilly
123	106.821	40.7751	2.01	grassland	grassland	desert
124	110.707	35.5515	0.77	farmland	farmland	flat	N	96
125	104.888	35.4612	17.84	farmland	built-up	hilly	Y	12
126	108.831	37.9299	2.62	desert	desert	desert
127	106.783	37.3732	2.59	grassland	farmland	desert
128	110.639	39.2202	7.01	grassland	grassland	hilly
129	109.604	35.1422	13.6	grassland	grassland	hilly
130	105.799	36.8898	15.63	farmland	farmland	hilly	N	68
131	101.898	35.5567	24.69	forest	grassland	forest
132	113.798	39.7191	24.13	forest	forest	forest
133	111.399	37.0829	10	grassland	forest	hilly
134	108.438	34.5083	2.3	farmland	farmland	flat	N	68
135	107.416	37.8386	4.22	grassland	forest	desert
136	111.525	34.781	11.09	farmland	farmland	hilly	N	22
137	107.76	40.571	1.03	desert	desert	desert
138	106.799	37.8595	5.1	desert	desert	desert
139	112.438	34.6927	2.91	built-up	built-up	other
140	104.072	36.6681	12.36	grassland	grassland	gully
141	106.501	40.5709	0.77	grassland	grassland	desert
142	107.742	37.4447	3.66	farmland	farmland	flat	N	75
143	103.29	35.3065	13.35	grassland	grassland	hilly
144	106.692	36.9105	10.61	grassland	grassland	gully
145	106.075	35.0129	12.79	farmland	grassland	hilly	Y	13
146	113.102	37.0062	12.54	grassland	farmland	hilly
147	112.452	38.4198	5.83	grassland	farmland	hilly
148	111.447	34.9731	41.18	forest	forest	forest
149	113.163	38.8535	22.88	forest	forest	forest
150	106.668	38.6753	7.41	desert	desert	desert
151	110.935	38.8892	14.43	grassland	grassland	hilly
152	108.537	37.0855	20.67	grassland	grassland	gully
153	114.312	39.7509	0	water	water	other
154	106.795	38.504	4.72	grassland	grassland	desert
155	113.171	40.2127	4.07	forest	forest	flat
156	106.602	36.5649	11.86	grassland	grassland	gully
157	108.055	36.9532	16.99	farmland	farmland	hilly	Y	9
158	104.138	35.0503	10.75	grassland	grassland	hilly
159	108.93	39.8877	8.42	grassland	grassland	desert
160	107.84	34.3013	2.18	farmland	farmland	flat	N	67
161	109.604	36.3699	19.45	grassland	forest	hilly
162	103.083	35.362	7.69	forest	forest	forest
163	103.698	35.4998	20.1	grassland	grassland	hilly
164	112.714	38.4812	0.26	farmland	farmland	flat	N	130
165	106.7	36.7434	12.31	grassland	grassland	hilly
166	105.523	37.0715	1.31	grassland	grassland	desert
167	105.131	36.8486	7.08	grassland	farmland	gully
168	111.761	37.1324	1.06	water	water	other
169	113.427	38.4757	7.56	forest	forest	forest
170	107.559	38.735	3.5	grassland	grassland	desert
171	109.433	39.4134	0.93	desert	desert	desert
172	113.117	39.6947	0.93	farmland	farmland	flat	N	152
173	107.789	37.3491	13.9	grassland	grassland	hilly
174	108.001	37.6608	1.82	desert	desert	desert
175	111.625	37.8788	8.74	farmland	farmland	flat	N	34
176	100.973	36.7871	7.07	farmland	farmland	flat	N	19
177	106.978	38.6941	1.15	grassland	grassland	desert
178	105.725	36.5682	10.11	farmland	grassland	hilly	Y	14
179	112.652	37.6685	0.93	built-up	farmland	other
180	101.344	37.6094	12.25	grassland	grassland	hilly
181	111.548	37.8424	15.43	forest	forest	forest
182	108.955	34.0405	3.38	built-up	farmland	other
183	109.71	37.4656	24	grassland	grassland	gully
184	113.948	37.5619	9.48	farmland	farmland	hilly	Y	15
185	109.25	40.3116	2.59	grassland	farmland	desert
186	110.284	35.6178	25.48	forest	forest	forest
187	104.94	35.0489	12.61	farmland	grassland	hilly	Y	29
188	107.776	38.6285	1.06	desert	desert	desert
189	103.511	36.2717	9.75	grassland	grassland	hilly
190	104.282	37.0275	17.62	grassland	grassland	hilly
191	105.676	34.2151	15.37	farmland	farmland	hilly	Y	14
192	111.18	38.3827	20.53	grassland	farmland	gully
193	109.609	37.8491	11.96	grassland	grassland	gully
194	108.477	37.6152	0.51	farmland	farmland	flat	N	41
195	113.478	35.5784	16.8	forest	forest	forest
196	114.05	39.6138	8.17	grassland	farmland	gully
197	110.542	34.8688	4.64	built-up	farmland	other
198	111.406	38.4954	18.57	forest	forest	forest
199	108.22	33.9121	39.25	forest	grassland	forest
200	109.837	40.1056	6.54	grassland	grassland	desert
201	111.802	34.8079	4.72	built-up	built-up	other
202	103.761	37.1842	7.78	farmland	grassland	hilly	N	13
203	107.445	37.3923	11.58	farmland	farmland	hilly	N	96
204	106.897	35.4782	1.31	grassland	water	hilly
205	111.897	35.5661	23.95	forest	forest	forest
206	102.521	35.8153	8.73	grassland	grassland	hilly
207	110.028	34.5655	1.15	farmland	farmland	flat	N	173
208	108.651	36.4242	10.93	forest	forest	forest
209	110.496	38.2137	10.05	grassland	farmland	hilly
210	111.599	39.9606	12.34	grassland	grassland	gully
211	109.408	38.3687	2.43	desert	desert	desert
212	108.856	37.3608	16.39	grassland	forest	hilly
213	105.767	35.0457	11.69	built-up	built-up	other
214	108.189	36.8443	7.85	farmland	grassland	gully	N	7
215	107.815	38.8624	2.07	farmland	grassland	flat	N	87
216	112	36.1066	16.58	grassland	grassland	hilly
217	107.133	34.7494	9.72	grassland	forest	gully
218	103.165	35.4784	20.17	farmland	grassland	hilly	Y	19
219	109.202	40.9143	1.29	grassland	grassland	desert
220	105.564	35.3576	10.74	farmland	grassland	hilly	Y	12
221	109.64	39.4363	1.82	farmland	grassland	flat	N	58
222	111.599	39.8798	14.67	grassland	grassland	gully
223	102.18	35.9568	17.08	grassland	grassland	gully
224	112.629	35.6911	16.51	forest	forest	forest
225	109.048	37.6187	9.37	grassland	farmland	desert
226	108.093	35.9417	24.27	forest	forest	gully
227	106.652	37.5827	2.55	desert	desert	desert
228	109.951	37.687	9.09	grassland	farmland	gully
229	107.061	39.9124	7.75	grassland	grassland	gully
230	107.956	36.2217	29.47	grassland	grassland	hilly	Y
231	107.238	38.1184	3.13	grassland	grassland	desert
232	109.903	37.2018	15.76	grassland	forest	gully
233	109.898	35.2776	4.26	farmland	farmland	flat		296
234	110.064	39.5877	10.03	grassland	grassland	hilly
235	110.306	36.5137	18.24	grassland	farmland	hilly
236	110.186	36.4124	18.24	grassland	farmland	hilly	Y
237	106.455	35.8457	23.22	farmland	grassland	hilly	Y	9
238	102.922	35.9606	7.39	grassland	grassland	gully
239	101.821	36.1551	12.88	farmland	grassland	hilly	N	23
240	106.847	35.6196	2.07	farmland	farmland	flat	N	169
241	107.087	39.6702	9.6	grassland	grassland	hilly
242	109.598	39.8209	5.2	grassland	grassland	flat
243	109.393	36.9115	13.02	grassland	farmland	gully
244	111.068	36.8077	8.45	grassland	grassland	hilly
245	106.292	36.193	9.38	farmland	grassland	hilly	Y	23
246	106.995	39.6822	13.04	desert	desert	hilly
247	109.897	38.8455	0.73	grassland	forest	desert
248	110.709	39.9563	5.41	desert	desert	hilly
249	111.51	36.8949	10.28	grassland	built-up	hilly	Y
250	109.542	34.0689	40.44	forest	forest	forest
251	113.659	37.9893	8.11	grassland	grassland	hilly
252	108.73	34.1484	0.51	built-up	farmland	other
253	109.795	34.7314	0.58	farmland	farmland	flat	N	223
254	102.21	35.4278	9.57	grassland	grassland	hilly
255	106.611	37.4827	8.03	grassland	grassland	desert
256	111.244	40.5208	1.06	water	farmland	other
257	110.411	37.3508	6.95	grassland	grassland	gully
258	110.242	36.5127	7.71	grassland	grassland	gully
259	106.976	34.3146	13.24	forest	forest	forest
260	106.017	38.3096	0.77	farmland	farmland	flat	N	108
261	103.853	35.3616	1.5	built-up	farmland	other
262	112.752	39.6648	5.94	farmland	farmland	flat	N	75
263	112.281	36.575	6.05	forest	forest	forest
264	109.966	35.3012	3.34	farmland	farmland	flat	N	317
265	111.992	35.584	11.37	farmland	forest	flat	N	27
266	109.479	37.2731	13.65	grassland	grassland	hilly
267	111.877	39.8918	12.38	grassland	grassland	hilly	Y	6
268	110.161	35.2657	3.1	farmland	farmland	flat	N	106
269	104.017	36.9876	6.36	grassland	farmland	hilly
270	110.005	37.2636	19.24	grassland	forest	hilly
271	106.35	39.2022	9.99	grassland	grassland	hilly
272	105.298	35.8646	11.45	farmland	farmland	hilly	Y	24
273	112.831	34.7	0.51	farmland	water	flat	N	184
274	109.334	40.8714	2.77	grassland	grassland	desert
275	101.087	37.2615	13.82	grassland	grassland	hilly
276	113.218	35.6455	7.29	forest	grassland	forest
277	112.934	36.0893	0.58	built-up	built-up	other
278	107.392	39.5372	3.86	grassland	grassland	desert
279	107.943	39.3336	3.43	grassland	grassland	desert
280	106.702	35.1056	11.68	grassland	farmland	gully
281	106.931	34.8069	5.78	farmland	farmland	hilly	Y	25
282	110.867	39.1884	7.47	grassland	farmland	gully
283	108.965	37.5457	5.05	desert	desert	desert
284	109.963	34.6633	1.09	farmland	farmland	flat	N	99
285	102.841	36.5828	2.3	farmland	farmland	flat	N	58
286	110.818	35.288	6.95	farmland	farmland	flat	N	145
287	110.992	37.294	10.23	farmland	farmland	hilly	Y	7
288	113.307	36.7031	69.72	forest	forest	forest
289	109.809	37.165	17.71	grassland	grassland	gully
290	107.807	36.2382	22.17	grassland	grassland	gully
291	112.716	34.4746	6.69	forest	grassland	forest
292	106.12	36.3366	0.93	farmland	farmland	flat	N	15
293	108.07	36.5601	13.48	grassland	grassland	gully
294	110.748	35.0284	0.51	farmland	farmland	flat	N	47
295	104.206	35.1361	8.19	grassland	farmland	hilly
296	108.873	40.2812	3.11	desert	desert	desert
297	104.479	35.5948	10.94	farmland	grassland	hilly	Y	5
298	112.71	36.375	11.41	grassland	farmland	hilly
299	106.814	38.7622	6.18	desert	desert	desert
300	108.189	36.5876	9.37	farmland	grassland	hilly	Y	11
301	101.89	37.2875	17.95	farmland	farmland	hilly	Y	15
302	109.343	34.3736	19.68	grassland	grassland	hilly
303	104.905	35.2322	11.26	farmland	grassland	hilly	Y	14
304	109.986	36.1419	22.65	grassland	grassland	gully
305	104.996	36.4681	3.38	farmland	farmland	flat	N	89
306	104.202	36.5284	3.01	built-up	built-up	other
307	110.903	40.3599	0.93	built-up	grassland	other
308	104.203	35.7483	14.18	farmland	grassland	hilly	Y	15
309	105.369	37.6369	2.01	desert	desert	desert
310	110.692	34.454	28.88	forest	forest	forest
311	113.726	37.4932	10.64	forest	forest	forest
312	108.122	40.9509	0.81	farmland	farmland	flat	N	102
313	107.389	40.6105	1.5	desert	desert	desert
314	105.035	35.0454	13.97	grassland	grassland	gully
315	113.159	40.2554	2.2	grassland	water	desert
316	106.745	37.2045	6.47	grassland	grassland	desert
317	104.792	36.4112	12.48	grassland	grassland	hilly
318	104.942	37.4325	11.03	grassland	grassland	hilly
319	106.314	37.1722	16.5	grassland	forest	hilly
320	112.061	37.5787	20.13	forest	forest	forest
321	101.989	35.8547	42.6	forest	forest	forest
322	113.297	39.7856	0.77	farmland	farmland	flat	N	21
323	108.348	40.296	0.26	grassland	grassland	desert
324	105.412	35.2765	9.25	built-up	grassland	other
325	106.335	36.043	13.04	farmland	grassland	hilly	Y	16
326	101.226	36.1235	16.89	grassland	grassland	hilly
327	111.426	38.6409	9.06	forest	forest	forest
328	107.375	35.6418	8.39	farmland	farmland	hilly	Y	18
329	108.038	38.2307	1.31	desert	desert	desert
330	107.045	34.1861	23.51	forest	forest	forest
331	107.356	40.0421	2.2	grassland	grassland	desert
332	107.622	41.2548	0.58	farmland	forest	flat	N	138
333	112.171	36.0676	9.87	forest	forest	forest
334	103.597	35.5354	17.4	farmland	grassland	hilly	Y	28
335	110.051	38.3034	15.36	grassland	grassland	gully
336	108.054	37.2465	15.7	grassland	grassland	gully
337	104.379	35.2135	8.07	farmland	farmland	hilly	Y	27
338	112.626	36.2416	4.5	grassland	grassland	hilly
339	112.69	38.7494	0.77	built-up	built-up	other
340	111.696	36.34	1.56	farmland	farmland	flat	N	143
341	113.519	37.7521	8.23	grassland	grassland	hilly
342	107.325	37.2978	12.39	farmland	farmland	hilly	N	30
343	110.448	39.8906	12.17	grassland	grassland	hilly
344	113.683	39.9696	0.73	water	water	other
345	107.799	36.2495	27.38	grassland	farmland	hilly
346	112.611	38.3596	11.5	farmland	farmland	hilly	N	76
347	111.797	39.5337	10.15	grassland	grassland	hilly
348	105.909	36.3093	13.11	grassland	grassland	gully
349	108.542	38.9339	0.51	desert	desert	desert
350	107.377	35.0584	7.84	grassland	grassland	gully
351	112.243	38.1122	9.03	water	forest	other
352	107.856	38.234	2.37	grassland	grassland	desert
353	106.483	34.7298	21.68	forest	forest	forest
354	106.08	35.5364	17.82	farmland	farmland	hilly	Y	12
355	111.068	40.6003	0.36	farmland	farmland	flat	N	142
356	111.246	39.5064	11.55	grassland	grassland	gully
357	111.959	39.1262	11.82	grassland	grassland	hilly
358	111.406	34.9437	21.42	forest	forest	forest
359	110.411	39.0426	14.49	grassland	farmland	hilly
360	108.158	40.9193	0.51	built-up	farmland	other
361	105.137	35.447	12.99	grassland	forest	hilly
362	109.171	39.3811	2.37	grassland	grassland	desert
363	111.034	34.4166	18.85	forest	grassland	forest
364	110.251	35.3879	10.02	built-up	forest	other
365	108.521	38.145	3.14	grassland	grassland	desert
366	107.938	39.0155	3.01	grassland	grassland	desert
367	113.857	37.5937	16.86	forest	grassland	forest
368	112.017	38.2564	12.14	farmland	farmland	hilly	N	32
369	112.033	38.7649	22.98	forest	forest	forest
370	101.523	36.9463	32.04	forest	farmland	forest
371	101.709	36.1658	18.38	grassland	grassland	hilly
372	111.635	39.1754	12.44	farmland	forest	hilly	Y	15
373	103.127	36.6805	5.35	farmland	farmland	hilly	Y	18
374	110.045	40.0493	8.11	grassland	grassland	hilly
375	113.575	40.1394	12.03	grassland	grassland	hilly
376	109.147	35.2389	10.37	forest	forest	forest
377	101.514	37.6472	23.02	grassland	grassland	hilly
378	103.975	34.8224	30.64	forest	forest	forest
379	113.809	39.1799	10.05	grassland	grassland	gully
380	101.247	36.7475	19.63	grassland	farmland	gully
381	112.092	37.4104	0.36	farmland	farmland	flat	N	158
382	106.396	36.5106	11.55	farmland	farmland	hilly	Y	29
383	112.378	36.9276	7.13	forest	forest	forest
384	103.298	35.2819	11.77	forest	grassland	forest
385	111.881	34.3838	11.47	forest	forest	forest
386	104.667	36.1224	28.57	grassland	grassland	gully
387	111.298	34.8722	6.37	grassland	grassland	hilly
388	109.054	40.2666	4.78	desert	desert	desert
389	112.311	34.7932	11.07	farmland	farmland	hilly	Y	8
390	112.178	37.7724	10.88	forest	forest	forest
391	106.093	38.4227	1.39	farmland	farmland	flat	N	26
392	107.832	38.4258	1.46	grassland	grassland	desert
393	111.318	36.6655	8.49	farmland	grassland	hilly	N	38
394	109.444	38.7581	1.63	grassland	farmland	desert
395	112.601	39.2668	0.93	farmland	farmland	flat	N	153
396	111.444	38.3365	16.14	forest	forest	forest
397	112.415	40.1963	0.36	farmland	forest	flat	N	97
398	106.911	39.4028	9.78	desert	desert	hilly
399	113.545	38.7402	39.93	forest	grassland	forest
400	111.215	39.2197	10.52	grassland	grassland	hilly
401	110.092	34.7968	1.39	built-up	farmland	other
402	108.596	40.0306	1.56	desert	desert	desert
403	105.683	36.8241	8.99	grassland	grassland	gully
404	110.017	40.7604	5.91	grassland	grassland	hilly
405	109.579	36.8516	12.89	grassland	farmland	gully
406	112.055	35.2032	21.73	forest	forest	forest
407	111.165	35.3736	11.45	farmland	grassland	hilly	Y	31
408	111.338	35.7303	0.81	farmland	farmland	flat	N	118
409	103.66	36.4089	5.94	farmland	farmland	gully	Y	31
410	106.336	39.0121	0.58	built-up	grassland	other
411	111.253	36.4935	10.67	grassland	grassland	hilly
412	101.928	36.8304	19.47	grassland	farmland	hilly
413	107.355	38.105	2.57	grassland	grassland	desert
414	102.197	35.3305	12.24	grassland	water	gully
415	113.135	37.4363	6.4	forest	forest	forest
416	112.461	37.4489	1.15	farmland	farmland	flat	N	139
417	109.542	38.3382	1.31	grassland	farmland	flat
418	109.555	37.3385	20.13	grassland	forest	hilly
419	110.11	39.8499	5.5	grassland	farmland	gully
420	107.09	34.4584	12.14	forest	farmland	forest
421	108.372	35.9488	22.87	forest	forest	forest
422	104.662	37.4976	3.71	desert	desert	desert
423	109.106	35.8773	16.19	forest	grassland	forest
424	106.509	36.4159	13.86	farmland	farmland	hilly	Y	19
425	109.305	40.9307	2.37	farmland	grassland	flat	N	221
426	110.267	35.7704	16.01	forest	grassland	forest
427	107.067	38.1145	4.38	grassland	forest	desert
428	101.025	37.3376	23.31	grassland	grassland	hilly
429	104.449	36.2214	25.63	grassland	grassland	hilly
430	108.371	39.5929	2.37	grassland	grassland	desert
431	111.705	39.6503	12.46	grassland	farmland	gully
432	109.143	37.4771	6.83	farmland	farmland	flat	N	287
433	106.071	38.1537	0.36	farmland	farmland	flat	N	41
434	113.168	39.5034	0.58	farmland	farmland	flat	N	115
435	113.618	38.9908	31.21	forest	forest	forest
436	105.912	36.2774	10.37	farmland	grassland	hilly	Y	14
437	110.661	36.2078	16.74	forest	grassland	forest
438	104.163	37.0778	3.99	farmland	farmland	flat	Y	19
439	102.995	35.573	8.06	farmland	farmland	hilly	Y	7
440	101.874	35.9079	14.12	forest	grassland	forest
441	110.183	36.6279	20.59	grassland	grassland	gully
442	108.412	35.9823	11.91	forest	forest	forest
443	112.575	38.4888	2.33	farmland	farmland	flat	N	101
444	103.363	36.3848	18.18	grassland	grassland	hilly
445	109.847	37.0647	20.02	grassland	grassland	gully
446	108.237	38.5428	2.55	grassland	grassland	desert
447	111.876	40.8866	0.26	farmland	farmland	flat	N	206
448	104.417	35.9445	17.28	farmland	farmland	hilly	N	62
449	113.237	34.7316	6.95	built-up	grassland	other
450	107.945	40.4638	3.34	grassland	grassland	desert
451	103.094	36.6844	9.08	grassland	grassland	hilly
452	109.043	39.5776	0.93	farmland	grassland	flat	N	194
453	113.668	38.6732	18.29	forest	forest	forest
454	113.012	38.7389	6.21	grassland	grassland	gully
455	111.998	35.4101	29.07	forest	forest	forest
456	101.654	36.9771	2.33	farmland	farmland	flat	N	65
457	111.632	38.688	23.48	forest	grassland	forest
458	107.867	36.8824	23.91	grassland	farmland	gully
459	112.451	34.4387	0.81	farmland	farmland	flat	N	43
460	107.4	39.7371	2.73	grassland	grassland	desert
461	103.651	37.0328	5.42	farmland	farmland	gully	Y	26
462	109.414	37.7132	15.15	grassland	grassland	gully
463	113.461	35.6491	0.77	forest	forest	forest
464	108.926	37.5489	6.63	desert	desert	desert
465	110.163	38.6791	10.05	grassland	grassland	desert
466	107.834	37.8637	1.54	desert	desert	desert
467	107.876	35.9677	10.82	grassland	grassland	hilly
468	109.78	34.9441	6.85	grassland	grassland	gully
469	112.674	34.6672	0.81	farmland	farmland	flat	N	93
470	109.514	38.9162	2.07	grassland	grassland	desert
471	113.227	35.9637	11.45	grassland	forest	hilly
472	109.826	36.1065	10.08	forest	grassland	forest
473	107.299	37.2533	16.91	grassland	grassland	hilly
474	107.529	40.0936	3.6	grassland	grassland	desert
475	106.041	37.1513	10	grassland	farmland	hilly
476	113.184	37.3981	9.9	forest	forest	forest
477	111.872	38.0991	0	water	water	other
478	105.923	38.5456	9.25	desert	desert	desert
479	107.92	38.7175	0.77	desert	desert	desert
480	106.091	34.7565	2.07	farmland	farmland	flat	N	96
481	109.89	40.223	3.13	desert	desert	desert
482	101.183	37.3781	34.37	desert	desert	HP
483	106.901	40.77	0.73	farmland	farmland	flat	N	96
484	110.858	35.7	28.88	grassland	forest	hilly
485	103.955	37.3621	6.91	grassland	water	desert
486	109.084	38.4349	1.39	farmland	desert	flat	N	46
487	103.021	36.7882	20.98	grassland	grassland	hilly
488	109.256	38.9781	1.06	grassland	water	desert
489	111.368	40.6999	1.82	desert	desert	desert
490	106.42	34.9363	10.54	grassland	farmland	gully
491	109.347	35.4498	17.13	grassland	farmland	gully
492	110.507	40.2076	3.66	grassland	grassland	desert
493	105.272	37.5706	1.15	built-up	built-up	other
494	107.696	41.2639	1.54	farmland	farmland	flat	N	105
495	106.174	36.434	12.52	farmland	farmland	hilly	N	96
496	107.957	40.1	2.84	grassland	grassland	desert
497	112.022	38.0684	20.17	forest	grassland	forest
498	105.879	38.0303	5.71	farmland	desert	desert	N	33
499	113.57	37.1548	12.62	forest	grassland	forest
500	112.911	36.9751	9.05	grassland	grassland	hilly
501	109.631	35.6837	17.88	grassland	farmland	gully
502	109.944	35.5708	11.03	farmland	forest	hilly	N	39
503	107.335	35.1552	13.49	grassland	grassland	hilly	Y
504	107.32	40.2623	5.18	desert	desert	desert
505	107.641	35.9658	22.49	farmland	farmland	hilly	N	48
506	103.5	36.0825	26.34	farmland	farmland	hilly	Y	16
507	101.723	37	17.49	grassland	grassland	hilly
508	101.948	35.3347	45.85	forest	forest	forest
509	110.769	39.2609	13.44	grassland	farmland	hilly
510	107.454	37.1053	8.13	farmland	farmland	hilly	N	65
511	109.536	40.8069	7.73	grassland	grassland	desert
512	106.213	38.5507	1.56	water	farmland	other
513	108.139	37.87	1.73	desert	desert	desert
514	112.157	39.4609	20.64	grassland	grassland	hilly
515	101.481	37.607	18.08	grassland	grassland	HP
516	112.216	35.8997	19.77	forest	forest	forest
517	113.934	40.1696	5.8	built-up	built-up	gully
518	108.621	36.957	15.56	grassland	grassland	gully
519	105.437	37.4471	2.65	farmland	farmland	flat	N	15
520	104.011	34.8367	10.18	grassland	forest	hilly
521	110.067	39.4944	4.15	built-up	grassland	other
522	112.559	35.4611	6.51	farmland	farmland	hilly	Y	10
523	107.242	35.5182	22.68	farmland	farmland	hilly	Y	20
524	111.943	40.1631	10.4	grassland	grassland	hilly
525	110.693	38.7061	11.4	grassland	farmland	hilly
526	107.761	34.4718	4.16	farmland	farmland	flat	N	88
527	107.807	34.4865	8.32	farmland	grassland	flat	N	105
528	113.581	39.4411	19.75	grassland	grassland	hilly
529	109.375	37.3991	13.98	grassland	farmland	hilly	Y
530	111.547	35.5124	5.28	farmland	farmland	flat	N	104
531	109.516	38.7388	0.58	desert	desert	desert
532	105.132	36.7578	5.95	grassland	grassland	hilly
533	112.699	36.479	11.7	grassland	grassland	hilly
534	102.072	36.9502	4.88	water	farmland	other
535	105.08	36.6609	4.99	farmland	farmland	hilly	Y	78
536	112.29	34.3131	2.37	farmland	farmland	flat	N	13
537	111.147	36.8746	14.97	grassland	forest	hilly
538	101.775	36.9094	12.08	farmland	grassland	hilly	Y	21
539	112.539	36.9035	11.5	forest	forest	forest
540	103.352	35.8235	42.15	grassland	grassland	gully
541	102.523	37.1525	39.5	grassland	grassland	HP
542	109.483	36.5683	18.18	grassland	built-up	hilly
543	112.549	37.5147	0.36	farmland	farmland	hilly	Y	90
544	109.634	36.3727	18.48	forest	forest	forest
545	110.774	37.0827	18.24	grassland	grassland	gully
546	109.109	40.7354	32.12	grassland	forest	hilly
547	111.135	37.5074	6.66	farmland	farmland	hilly	Y	10
548	108.41	34.8803	2.07	farmland	farmland	flat	N	40
549	109.48	39.3563	2.91	farmland	grassland	flat	N	56
550	108.947	38.7859	7.11	desert	desert	desert
551	112.347	38.084	5.87	forest	forest	forest
552	103.963	35.9435	9.38	farmland	farmland	hilly	Y	57
553	107.137	35.9041	19	farmland	farmland	hilly	Y	25
554	105.55	35.0702	16.45	grassland	farmland	gully	Y
555	108.042	34.9147	10.13	grassland	grassland	hilly
556	112.368	37.1616	14.12	farmland	farmland	hilly	Y	5
557	107.614	35.5202	12.33	farmland	farmland	hilly	Y	33
558	101.974	35.895	27.46	grassland	grassland	hilly
559	109.33	38.2032	1.15	grassland	grassland	gully
560	105.218	35.321	11.36	farmland	farmland	hilly	Y	14
561	104.825	36.7049	1.31	farmland	farmland	flat	N	15
562	110.267	35.4118	17.69	grassland	farmland	hilly
563	113.491	38.0358	10.91	built-up	grassland	other
564	102.213	36.7712	31.35	forest	forest	HP
565	111.148	38.0881	9.79	grassland	forest	gully
566	110.418	34.8099	34.85	forest	forest	forest
567	112.617	36.1148	10.84	forest	forest	forest
568	112.066	38.1001	19.99	forest	grassland	forest
569	107.644	40.5664	1.63	desert	desert	desert
570	101.329	37.251	20.09	forest	forest	forest
571	113.403	37.5485	10.84	grassland	forest	gully
572	107.103	39.5975	6.18	desert	desert	gully
573	110.11	39.4624	3.43	desert	desert	desert
574	112.374	37.3634	0.73	farmland	farmland	flat	N	109
575	105.081	35.0247	12.85	farmland	farmland	hilly	Y	70
576	110.519	37.0257	17.12	farmland	grassland	hilly	N	35
577	107.026	36.804	9.43	grassland	forest	gully
578	111.614	34.6158	6.39	grassland	water	hilly
579	109.898	35.0244	9	grassland	farmland	hilly
580	101.58	37.5815	37.99	forest	forest	forest
581	108.391	41.1351	0.36	farmland	built-up	flat	N	30
582	104.347	37.1038	11.65	farmland	grassland	hilly	N	143
583	107.818	38.0363	0.81	grassland	grassland	desert
584	107.715	34.0581	12.09	forest	forest	forest
585	113.481	38.8662	17.08	grassland	grassland	gully
586	111.51	39.6361	11.43	grassland	grassland	hilly
587	109.371	40.461	0.36	farmland	farmland	flat	N	90
588	110.795	34.9722	1.29	farmland	farmland	flat	N	136
589	111.623	35.4732	3.75	farmland	farmland	flat	N	69
590	110.174	35.0714	1.56	farmland	farmland	flat	N	283
591	111.538	35.5897	5.07	farmland	farmland	flat	N	65
592	101.995	37.1529	37.16	forest	forest	forest
593	101.153	37.1909	30.78	forest	forest	HP
594	112.138	38.2988	15.33	forest	forest	forest
595	108.729	36.5086	12.51	forest	forest	forest
596	108.145	35.2733	19.47	grassland	forest	gully
597	109.835	35.3086	4.12	farmland	farmland	flat	N	183
598	109.23	40.8562	2.65	desert	desert	desert
599	105.1	34.8756	14.31	farmland	forest	hilly	Y	15
600	108.126	39.7238	4.28	grassland	grassland	desert
601	101.571	36.7804	17.28	farmland	grassland	hilly	N	26
602	112.465	34.8916	8.64	forest	farmland	forest
603	112.739	36.218	6.67	farmland	farmland	hilly	Y	31
604	107.67	39.2923	0.93	grassland	grassland	desert
605	113.214	40.0221	1.15	built-up	farmland	other
606	104.446	36.4852	19.76	grassland	grassland	hilly
607	106.422	36.8491	13.34	farmland	farmland	hilly	Y	18
608	112.672	34.5787	2.78	grassland	farmland	gully
609	109.953	39.7787	5.14	built-up	grassland	other
610	111.799	39.8477	6.81	grassland	farmland	gully
611	108.06	38.8639	3.25	desert	desert	desert
612	111.567	39.907	10.77	grassland	grassland	gully
613	106.898	36.2849	9.26	grassland	forest	hilly
614	108.209	33.8539	43.18	forest	grassland	forest
615	104.508	36.3694	33	grassland	grassland	hilly
616	105.151	36.3184	13.67	farmland	grassland	gully	Y	32
617	105.904	37.5872	2.01	farmland	farmland	flat	N	37
618	109.257	34.799	4.15	farmland	farmland	flat	N	60
619	111.333	36.1427	15.95	grassland	grassland	hilly
620	109.955	36.4824	28.02	grassland	forest	hilly
621	108.619	39.4834	8.62	grassland	grassland	desert
622	112.764	36.5515	6.63	farmland	grassland	hilly	Y	14
623	112.956	36.3746	0.26	farmland	forest	flat	N	227
624	111.539	39.5613	20.65	grassland	forest	gully
625	107.585	36.0582	13.65	grassland	farmland	hilly
626	109.963	36.6895	28.35	grassland	farmland	gully
627	103.97	37.5086	2.44	farmland	farmland	flat	N	70
628	104.315	34.9269	17.7	farmland	farmland	hilly	Y	22
629	112.784	38.2301	9.19	forest	forest	forest
630	107.299	35.2395	15.73	grassland	grassland	hilly	Y	18
631	111.501	34.1881	21.04	forest	farmland	forest
632	106.727	34.4559	34.37	forest	grassland	forest
633	106.269	38.2394	1.15	water	water	other
634	110.098	40.4967	0.26	farmland	farmland	flat	N	139
635	114.161	39.5001	3.5	water	farmland	other
636	102.144	37.0649	31.01	desert	desert	HP
637	112.051	38.2689	15.58	grassland	farmland	hilly	Y	29
638	111.135	34.5382	9.88	forest	forest	forest
639	113.347	34.8455	0.51	built-up	built-up	other
640	108.282	39.0634	2.93	desert	desert	desert
641	107.742	37.5113	4.38	farmland	farmland	flat	N	95
642	111.842	37.65	10.49	forest	forest	forest
643	102.207	36.3247	5.95	grassland	grassland	hilly
644	108.214	33.9504	16.4	forest	forest	forest
645	110.918	38.3919	18.91	grassland	grassland	hilly
646	109.16	39.997	11.19	grassland	grassland	desert
647	101.136	37.4807	7.77	grassland	water	HP
648	113.318	37.6556	13.5	farmland	farmland	hilly	Y	10
649	114.192	40.3106	9.78	farmland	grassland	flat	N	40
650	104.676	35.6226	13.58	farmland	grassland	hilly	Y	36
651	114.007	37.6013	18.45	forest	grassland	forest
652	107.659	37.623	0.26	farmland	grassland	flat	N	8
653	105.35	35.7831	7.83	farmland	grassland	hilly	Y	42
654	111.254	38.8257	20.72	grassland	grassland	gully
655	105.106	34.9522	6.9	farmland	grassland	hilly	N	31
656	111.126	40.5532	0.93	farmland	farmland	flat	N	37
657	113.273	38.5269	20.74	forest	grassland	HP
658	112.431	34.4343	2.57	built-up	built-up	other
659	104.02	36.4515	11.12	grassland	grassland	hilly
660	108.398	36.4969	22.33	grassland	grassland	gully
661	105.533	35.8123	10.78	farmland	grassland	hilly	Y	17
662	102.776	36.4574	14.45	grassland	grassland	hilly
663	111.449	36.8901	18.52	forest	farmland	forest
664	107.723	35.373	2.77	farmland	grassland	hilly	N	25
665	110.348	34.9835	10.12	farmland	grassland	hilly	Y	11
666	108.224	36.8337	11.51	grassland	grassland	hilly
667	106.829	39.033	1.29	farmland	farmland	flat	N	44
668	110.69	37.8912	15.16	grassland	forest	hilly
669	111.968	34.4667	9.43	farmland	farmland	hilly	N	31
670	111.504	35.6787	4.78	built-up	built-up	other
671	111.571	36.9301	15.19	grassland	grassland	hilly
672	109.019	40.4481	1.06	grassland	grassland	desert
673	112.696	37.0149	13.9	grassland	grassland	hilly
674	107.59	40.6993	1.65	desert	desert	desert
675	106.607	35.0572	13.77	forest	grassland	forest
676	113.539	39.1204	28.46	forest	forest	forest
677	111.659	38.3584	7.02	grassland	farmland	gully
678	109.66	39.8428	8.17	grassland	grassland	gully
679	110.064	40.2984	1.5	grassland	grassland	desert
680	106.975	38.8601	3	grassland	grassland	desert
681	109.455	35.1656	1.39	farmland	farmland	flat	N	117
682	111.795	38.323	14.96	grassland	farmland	gully
683	108.784	40.9135	1.39	grassland	water	desert
684	104.725	35.6734	16.82	farmland	grassland	hilly	Y	25
685	109.785	39.5376	0.81	built-up	farmland	other
686	105.549	37.0539	1.15	grassland	grassland	desert
687	109.953	37.6157	14.16	grassland	farmland	gully
688	111.308	34.7489	11.37	grassland	farmland	hilly
689	102.216	35.1487	9.77	grassland	grassland	hilly
690	104.666	35.8825	19.67	farmland	grassland	hilly	Y	15
691	111.505	37.1357	14.58	grassland	farmland	hilly
692	114.372	40.3181	13.52	farmland	farmland	hilly	N	23
693	112.478	35.4994	6.98	built-up	built-up	other
694	110.129	39.7372	7.13	grassland	forest	gully
695	110.575	39.2317	6.41	grassland	farmland	gully
696	105.914	35.3306	16.67	farmland	farmland	hilly	Y	10
697	102.037	36.6468	12.12	grassland	grassland	gully
698	101.52	37.465	4.39	farmland	farmland	flat	N	164
699	108.686	38.4311	0.81	desert	desert	desert
700	109.41	40.4954	0.77	farmland	grassland	flat	N	107
701	109.051	34.2108	3.57	farmland	forest	flat	N	11
702	107.794	38.7405	1.29	grassland	grassland	desert
703	113.26	39.0263	26.12	grassland	grassland	hilly
704	107.668	40.2115	1.56	grassland	grassland	desert
705	109.457	39.1971	1.96	grassland	grassland	desert
706	108.792	36.9079	12.27	grassland	grassland	gully
707	110.239	37.7792	15.96	grassland	grassland	gully
708	107.324	41.1588	0.73	farmland	farmland	flat	N	68
709	112.684	36.0662	13.4	forest	grassland	forest
710	110.578	37.8407	20.6	grassland	farmland	hilly
711	110.768	36.9995	15.77	farmland	grassland	hilly	Y	18
712	107.317	40.9185	0.77	farmland	desert	flat	N	88
713	107.362	40.8612	0.81	farmland	farmland	flat	N	43
714	108.556	35.0868	15.64	forest	grassland	forest
715	108.881	38.243	1.39	desert	desert	desert
716	113.435	38.1404	9.51	built-up	grassland	other
717	108.962	35.1692	17.51	forest	grassland	forest
718	101.146	36.4201	7.95	grassland	grassland	HP
719	109.252	40.5191	1.15	grassland	grassland	desert
720	111.748	35.7806	3.66	farmland	farmland	flat	N	51
721	105.622	37.7331	2.43	desert	desert	desert
722	108.92	41.2218	4.58	grassland	grassland	desert
723	109.323	40.7103	8.63	grassland	grassland	hilly
724	107.657	34.8754	1.06	farmland	farmland	hilly	N	18
725	112.61	35.4124	26.64	forest	forest	forest
726	110.72	40.2875	0.26	farmland	farmland	flat	N	193
727	112.727	36.6318	5.92	farmland	farmland	hilly	Y	41
728	102.988	36.7587	8.6	farmland	farmland	desert	N	71
729	111.922	38.4922	11.2	farmland	grassland	hilly	Y	21
730	109.193	35.2696	17.77	forest	forest	forest
731	105.981	38.3186	2.07	farmland	desert	flat	N	224
732	107.57	38.3091	0.36	desert	desert	desert
733	106.081	38.1875	1.06	farmland	farmland	flat	N	44
734	107.39	35.4689	11.26	farmland	grassland	hilly	N	17
735	109.64	36.8081	10.47	grassland	farmland	hilly
736	113.46	38.6374	33.88	forest	grassland	forest
737	111.467	38.726	11.39	grassland	forest	hilly
738	109.044	36.8801	25.19	farmland	farmland	hilly	N	74
739	110.913	35.2623	8.54	farmland	farmland	flat	N	67
740	113.606	38.9935	26.43	forest	grassland	forest
741	110.55	40.2199	0.81	grassland	grassland	desert
742	111.409	36.2961	7.25	farmland	grassland	hilly	N	55
743	106.776	39.3902	6	farmland	farmland	desert	N	22
744	107.072	38.3776	2.18	grassland	grassland	desert
745	113.29	38.7016	9.88	farmland	farmland	hilly	Y	18
746	109.084	41.1209	7.97	grassland	grassland	hilly
747	111.626	34.2182	19.87	forest	forest	forest
748	107.331	34.698	11.29	forest	grassland	forest
749	111.465	39.1464	6.36	farmland	farmland	hilly	N	47
750	109.382	34.6503	1.65	built-up	farmland	other
751	105.92	36.5397	7.11	farmland	grassland	hilly	Y	17
752	109.511	36.2411	6.95	forest	grassland	forest
753	112.07	35.0831	12.19	grassland	grassland	hilly
754	104.357	35.6898	16.91	grassland	grassland	gully
755	106.505	40.6686	0.26	desert	desert	desert
756	109.472	40.8973	2.53	farmland	farmland	flat	N	109
757	107.546	39.3561	2.88	grassland	grassland	desert
758	108.031	35.4134	0.58	farmland	farmland	flat	N	175
759	114.056	39.8068	10	farmland	farmland	hilly	Y	17
760	103.057	35.6902	30.83	farmland	farmland	hilly	N	19
761	105.513	34.9888	14.95	farmland	farmland	hilly	N	51
762	101.763	36.0754	10.56	forest	forest	forest
763	111.546	38.8698	12.58	forest	forest	forest
764	108.837	37.9911	10.31	grassland	farmland	hilly
765	101.194	37.3342	21.3	grassland	grassland	HP
766	107.636	37.451	2.07	farmland	farmland	flat	N	234
767	102.34	35.5655	11.56	grassland	grassland	HP
768	108.72	36.1908	21.15	forest	farmland	forest
769	109.818	35.3466	10.86	grassland	grassland	gully
770	106.395	37.3218	6.28	grassland	farmland	desert
771	104.272	36.2083	11.1	grassland	grassland	hilly
772	110.088	34.8856	1.29	farmland	farmland	flat	N	62
773	108.716	35.9216	12.85	forest	forest	forest
774	108.754	36.5938	9.46	farmland	farmland	hilly	Y	20
775	112.685	38.5774	7.87	grassland	grassland	hilly
776	112.499	34.9212	1.06	water	built-up	other
777	113.96	39.3092	7.28	forest	forest	forest
778	111.326	37.1942	7.39	forest	forest	forest
779	105.981	35.0104	13.88	farmland	farmland	hilly	N	10
780	106.169	34.9096	7.12	grassland	grassland	gully
781	102.697	36.4922	27.88	farmland	farmland	hilly	Y	15
782	109.904	35.0487	9.77	farmland	farmland	hilly	N	58
783	109.713	40.7799	8.27	forest	forest	forest
784	107.79	39.7762	1.73	grassland	grassland	desert
785	103.297	36.0623	10.27	forest	farmland	forest
786	107.557	36.6907	21.66	grassland	grassland	gully
787	108.69	37.8	2.37	desert	desert	desert
788	109.137	40.4967	0.58	built-up	built-up	other
789	112.774	38.5811	2.2	farmland	farmland	flat	N	35
790	112.031	40.6129	0.81	farmland	farmland	flat	N	32
791	113.487	36.26	23.5	forest	farmland	forest
792	106.953	38.1893	1.87	desert	desert	desert
793	110.192	39.3666	8.79	grassland	farmland	hilly
794	110.285	36.9328	12.97	grassland	forest	gully
795	112.937	34.7121	10.68	farmland	farmland	flat	N	61
796	107.52	37.7263	1.29	farmland	farmland	desert	N	200
797	110.687	38.3013	25.62	grassland	farmland	gully
798	109.965	39.3701	3.8	grassland	grassland	desert
799	109.215	38.943	1.39	desert	desert	desert
800	109.464	35.3075	15.57	grassland	grassland	gully
801	109.843	39.2126	3.87	grassland	grassland	desert
802	103.016	36.1973	20.86	farmland	farmland	hilly	N	60
803	106.396	36.254	14.52	grassland	forest	hilly
804	106.069	36.1109	29.66	grassland	grassland	hilly
805	106.228	36.7669	12.39	farmland	grassland	hilly	N	119
806	105.899	37.39	3.58	farmland	farmland	flat	N	28
807	108.414	36.1483	14.34	forest	forest	forest
808	107.974	33.7831	27.55	forest	forest	forest
809	109.511	38.5641	2.83	desert	desert	desert
810	111.998	36.7347	21.6	forest	forest	forest
811	113.26	38.4433	22.28	forest	grassland	forest
812	105.458	37.1913	5.37	water	grassland	other
813	102.287	35.1858	20.83	forest	forest	HP
814	108.79	36.7542	2.88	farmland	farmland	hilly	N	55
815	112.113	35.7302	6.45	farmland	farmland	flat	N	43
816	107.364	35.3244	5.99	grassland	grassland	gully
817	107.679	35.1046	18.01	grassland	farmland	gully
818	107.885	40.9799	0.58	farmland	desert	flat	N	51
819	105.633	34.4224	14.47	forest	grassland	forest
820	107.325	39.2307	2.33	grassland	grassland	desert
821	110.235	40.0692	2.57	desert	desert	desert
822	112.432	35.48	5.78	built-up	built-up	other
823	106.407	36.2462	17	farmland	farmland	hilly	Y	8
824	113.084	35.4907	17.62	forest	forest	forest
825	111.559	35.9609	6.99	farmland	farmland	flat	Y	52
826	111.769	40.3088	7.47	grassland	grassland	desert
827	105.051	35.5848	2.33	built-up	built-up	other
828	106.143	35.9984	9.77	farmland	farmland	flat	Y	13
829	112.08	35.4231	19.46	forest	forest	forest
830	111.076	39.663	6.7	farmland	grassland	hilly	N	57
831	111.072	39.4466	10.62	grassland	grassland	hilly
832	109.059	40.0769	8.37	grassland	grassland	gully
833	110.391	38.7298	6.36	farmland	farmland	hilly	Y	16
834	111.215	40.3374	1.09	water	water	other
835	109.143	38.4056	1.29	grassland	grassland	desert
836	110.229	35.6461	8.4	forest	grassland	forest
837	113.965	37.784	31.78	forest	forest	forest
838	113.026	39.182	11.96	grassland	grassland	gully
839	105.34	36.4809	7.49	farmland	grassland	flat	N	64
840	110.774	36.8786	12.1	grassland	grassland	gully
841	106.555	36.8736	12.66	farmland	grassland	hilly	Y	7
842	110.082	39.71	7.59	grassland	grassland	hilly
843	109.474	40.8511	1.8	grassland	grassland	desert
844	102.164	37.0157	19.61	grassland	grassland	hilly
845	114.015	40.3513	0.73	farmland	farmland	flat	N	168
846	112.443	39.8408	4.99	farmland	farmland	flat	Y	39
847	113.07	40.2637	0.58	farmland	farmland	flat	N	251
848	111.921	37.9555	11.55	grassland	grassland	gully
849	107.953	38.4776	2.21	desert	desert	desert
850	111.394	35.5008	3.45	farmland	farmland	flat	N	76
851	108.927	36.1025	14.93	forest	farmland	forest
852	102.688	35.6208	12.48	farmland	farmland	hilly	Y	10
853	105.898	35.465	6.03	farmland	water	gully	Y	24
854	106.763	38.4623	2.57	grassland	grassland	desert
855	101.692	37.3679	5.24	farmland	farmland	flat	N	90
856	110.895	36.4998	14.07	grassland	grassland	gully
857	114.186	39.5414	14.01	grassland	grassland	hilly
858	105.681	35.2763	26.05	grassland	grassland	gully
859	108.998	40.5197	0.81	farmland	grassland	flat	N	107
860	109.529	33.9272	33.49	forest	forest	forest
861	107.693	39.7592	2.12	grassland	grassland	desert
862	108.654	35.3285	25.91	forest	forest	forest
863	105.236	37.2879	14.37	grassland	grassland	hilly
864	107.984	37.2797	15.37	grassland	grassland	gully
865	106.816	36.7908	11.42	grassland	grassland	gully
866	107.872	39.2028	3.1	grassland	grassland	desert
867	108.479	36.4803	13.8	grassland	forest	gully
868	110.966	38.1457	15.82	grassland	farmland	hilly
869	109.115	37.9128	8.97	grassland	grassland	desert
870	108.949	36.901	15.67	grassland	forest	gully
871	109.003	36.6734	19.36	grassland	grassland	gully
872	104.56	36.2406	13.12	farmland	grassland	hilly	Y	14
873	110.319	35.9493	19.04	forest	forest	forest
874	112.426	35.7887	11	forest	forest	forest
875	108.49	35.2927	13.12	farmland	farmland	hilly	N	32
876	110.105	37.396	8.61	grassland	farmland	flat
877	110.733	40.3746	0.26	grassland	grassland	flat
878	109.94	40.3233	1.15	farmland	desert	flat	N	244
879	110.191	36.5377	25.11	grassland	grassland	hilly
880	105.742	35.4432	7.04	farmland	grassland	hilly	Y	22
881	108.791	38.2859	1.87	grassland	grassland	desert
882	107.194	34.3408	6.02	built-up	farmland	other
883	109.226	37.4973	19.1	farmland	farmland	hilly	N	81
884	111.393	34.954	16.68	forest	forest	forest
885	109.927	39.6373	3.14	grassland	grassland	desert
886	111.928	39.898	17.29	grassland	forest	hilly
887	110.093	35.317	1.65	farmland	farmland	flat	N	165
888	108.129	37.0207	20.11	grassland	grassland	hilly
889	113.892	39.9386	4.72	farmland	farmland	flat	N	57
890	106.213	36.7484	8.74	farmland	grassland	hilly	Y	10
891	110.658	40.6865	25.85	forest	forest	forest
892	111.533	35.7841	6.43	grassland	farmland	flat
893	110.737	38.197	12.55	grassland	farmland	gully
894	107.059	34.6916	6.57	grassland	farmland	gully
895	104.397	37.1989	11.44	farmland	farmland	flat	N	80
896	109.382	37.6395	19.11	grassland	farmland	gully
897	109.587	40.3239	2.78	built-up	desert	other
898	114.169	39.8711	12.81	grassland	grassland	hilly
899	108.929	37.9812	0.81	desert	desert	desert
900	107.282	35.3289	11.05	farmland	grassland	hilly	Y	15
901	107.18	35.6828	3.89	built-up	grassland	other
902	109.195	41.1262	7.11	grassland	grassland	hilly
903	106.014	37.1644	8.24	farmland	grassland	hilly	N	103
904	109.443	37.4578	17.89	grassland	grassland	gully
905	111.808	35.7976	9.11	farmland	farmland	hilly	Y	16
906	106.727	36.323	12.33	grassland	grassland	hilly
907	110.393	37.7033	9.53	farmland	farmland	gully	N	19
908	107.569	35.1383	16.03	farmland	farmland	hilly	Y	8
909	112.089	39.1474	7.27	farmland	farmland	hilly	Y	35
910	102.767	35.749	11.18	farmland	farmland	hilly	Y	62
911	105.085	36.2885	18.68	grassland	grassland	gully
912	106.994	36.4898	7.25	grassland	grassland	gully
913	108.868	37.6519	6.47	grassland	grassland	desert
914	107.47	36.4886	8.74	farmland	farmland	hilly	Y	77
915	102.678	35.9117	14	grassland	farmland	hilly
916	105.862	37.0254	0.26	built-up	farmland	other
917	110.472	40.6784	12.53	grassland	grassland	hilly
918	105.783	36.5899	14.38	grassland	grassland	hilly
919	110.277	37.591	14.04	farmland	farmland	hilly	N	36
920	112.048	34.8835	10.1	forest	farmland	forest
921	105.387	36.5304	7.69	grassland	grassland	hilly
922	103.594	36.3495	5.3	water	farmland	other
923	109.942	34.8703	0.26	farmland	farmland	flat	N	167
924	111.188	35.6582	1.31	built-up	farmland	other
925	107.494	40.3399	2.53	grassland	grassland	desert
926	107.75	34.7819	21.25	grassland	grassland	hilly
927	113.42	37.01	17.85	forest	forest	forest
928	112.084	34.5234	1.15	farmland	farmland	flat	N	165
929	107.081	36.8883	11.33	grassland	grassland	gully
930	110.777	35.8813	20.24	grassland	forest	hilly
931	107.15	38.1965	0.51	grassland	grassland	desert
932	107.604	37.7701	3.5	grassland	grassland	desert
933	113.329	36.4893	9.07	farmland	farmland	hilly	N	16
934	112.731	39.7126	7.09	farmland	forest	flat	N	30
935	107.632	40.0587	6.17	grassland	grassland	desert
936	111.219	36.2248	19.77	forest	forest	forest
937	108.376	39.5087	4.66	desert	desert	desert
938	112.109	36.7093	27.15	forest	forest	forest
939	110.899	39.6669	6.43	grassland	grassland	desert
940	104.911	36.9172	2.84	farmland	farmland	desert	N	227
941	110.896	36.4682	19.19	grassland	grassland	gully
942	112.939	37.7345	5.95	farmland	grassland	hilly	Y	7
943	111.787	35.23	11.45	farmland	farmland	hilly	Y	10
944	106.446	36.3184	21.28	farmland	farmland	hilly	N	27
945	104.182	35.5386	14.52	grassland	grassland	hilly
946	101.421	37.3313	29.27	grassland	grassland	HP
947	111.882	37.6746	14.93	forest	forest	forest
948	103.369	36.7743	12.36	grassland	grassland	hilly
949	107.923	34.4054	2.57	built-up	farmland	other
950	109.696	40.4281	1.31	forest	forest	flat
951	108.635	35.1111	10.77	forest	grassland	forest
952	107.295	37.1078	31.38	grassland	farmland	gully
953	110.61	40.2766	2.2	built-up	grassland	other
954	109.275	34.634	1.5	farmland	farmland	flat	N	76
955	107.554	36.3849	19.25	grassland	farmland	gully
956	110.533	38.1573	15.89	grassland	farmland	hilly
957	107.707	39.0646	2.53	grassland	grassland	desert
958	108.448	36.8857	20.09	farmland	farmland	hilly	Y	14
959	101.674	36.4522	6.33	farmland	built-up	flat	N	19
960	113.403	37.6165	15.91	grassland	grassland	hilly
961	102.368	36.3519	10.48	farmland	farmland	hilly	Y	5
962	111.007	34.4461	22.32	forest	grassland	forest
963	111.347	35.5532	6.36	farmland	farmland	hilly	Y	9
964	112.855	38.938	12.68	farmland	farmland	hilly	N	27
965	113.171	38.5057	10.16	forest	forest	forest
966	104.007	36.1354	7.09	grassland	grassland	hilly
967	103.879	35.6919	9.02	farmland	grassland	hilly	Y	8
968	111.486	38.3097	17.02	forest	forest	forest
969	109.646	38.5883	3.5	desert	desert	desert
970	112.907	37.9386	1.29	farmland	farmland	flat	N	91
971	108.794	37.6101	0.93	built-up	farmland	other
972	109.626	38.2145	10.03	desert	desert	desert
973	105.706	36.0668	10.47	farmland	grassland	hilly	Y	7
974	109.673	39.1456	3.18	water	grassland	other
975	108.906	34.4198	1.87	built-up	built-up	other
976	104.938	34.4461	21.12	farmland	grassland	hilly	Y	23
977	108.239	37.1938	28.21	grassland	forest	gully
978	105.625	37.4785	1.87	farmland	built-up	flat	N	35
979	112.924	39.6437	0.93	farmland	grassland	flat	N	57
980	108.121	39.8779	12.43	grassland	grassland	desert
981	104.984	35.6681	7.91	farmland	farmland	hilly	Y	10
982	108.777	40.6706	5.47	grassland	grassland	gully
983	102.647	35.7793	44.02	forest	grassland	forest
984	107.055	37.0187	10.36	farmland	farmland	hilly	N	45
985	104.963	36.7389	4.26	farmland	farmland	flat	N	100
986	101.359	37.2248	33.32	forest	grassland	forest
987	106.763	40.334	1.82	desert	desert	desert
988	110.136	35.5333	21.04	grassland	grassland	hilly
989	104.315	37.1093	9.82	grassland	grassland	hilly
990	106.577	36.4656	13.97	farmland	forest	hilly	Y	18
991	109.186	38.5396	1.29	grassland	grassland	desert
992	106.008	37.2036	9.41	farmland	farmland	hilly	N	61
993	112.41	36.272	10.67	grassland	farmland	hilly
994	110.487	35.3538	7.26	water	water	other
995	110.864	39.5525	4.8	grassland	grassland	hilly
996	109.743	35.8866	4.44	forest	forest	forest
997	110.758	39.9989	4.95	grassland	grassland	desert
998	111.107	37.3711	11.62	farmland	farmland	hilly	Y	10
999	109.34	41.0727	16.38	grassland	grassland	hilly
1000	104.595	34.895	12.09	grassland	farmland	gully
