# Supplementary material for: Moderate topsoil erosion rates constrain the magnitude of theerosion-induced carbon sink and agricultural productivity losses on theChinese Loess Plateau
Source: Copernicus journal article supplement (doi:10.5194/bg-13-4735-2016), 2016-08-23
Supplement: Supplementary file [file bg-13-4735-2016-supplement-title-page.pdf › bg-13-4735-2016-supplement-title-page.pdf]

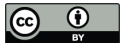

## *Supplement of*

# **Moderate topsoil erosion rates constrain the magnitude of the erosion-induced carbon sink and agricultural productivity losses on the Chinese Loess Plateau**

**Jianlin Zhao et al.**

*Correspondence to:* Jianlin Zhao (jianlin.zhao@ees.kuleuven.be)

- bg-13-4735-2016-supplement-title-page.pdf
- supplement
  - Supplement 1.xlsx
  - Supplement 2.xlsx
  - supplement.docx

The copyright of individual parts of the supplement might differ from the CC-BY 3.0 licence.
